# Supplementary material for: Perception of Coercion Among Patients With a Psychiatric Community Treatment Order: A Literature Review
Source: Atypon-hosted journal article supplement (doi:10.1176/appi.ps.201400538), 2015-10-01
Supplement: appi.ps.201400538.ds001.pdf [file appi.ps.201400538.ds001.pdf]

**Table 3: Search Strategy**

|                                                                                                                                                                                                                                                                                                                                                                                                                                                                                                                                                                                                                                                     |                                                                                                                                                                                                                                                                                                                                                                                                                                                                                                                                                                                                                                                                                                                                                                                                                                                                                                                                                |
|-----------------------------------------------------------------------------------------------------------------------------------------------------------------------------------------------------------------------------------------------------------------------------------------------------------------------------------------------------------------------------------------------------------------------------------------------------------------------------------------------------------------------------------------------------------------------------------------------------------------------------------------------------|------------------------------------------------------------------------------------------------------------------------------------------------------------------------------------------------------------------------------------------------------------------------------------------------------------------------------------------------------------------------------------------------------------------------------------------------------------------------------------------------------------------------------------------------------------------------------------------------------------------------------------------------------------------------------------------------------------------------------------------------------------------------------------------------------------------------------------------------------------------------------------------------------------------------------------------------|
| <b>a. Databases</b>                                                                                                                                                                                                                                                                                                                                                                                                                                                                                                                                                                                                                                 |                                                                                                                                                                                                                                                                                                                                                                                                                                                                                                                                                                                                                                                                                                                                                                                                                                                                                                                                                |
| <ul style="list-style-type: none"> <li>• Medline</li> <li>• Embase</li> <li>• PsycINFO</li> <li>• Social Work Abstracts</li> <li>• CINAHL</li> <li>• Social Sciences Abstracts</li> <li>• Web of Science</li> <li>• *Social Sciences Citation Index</li> <li>• Scopus (limited to Health Sciences and Social Sciences &amp; Humanities)</li> </ul>                                                                                                                                                                                                                                                                                                  | <ul style="list-style-type: none"> <li>• <b>EBM Reviews:</b><br/>                     Cochrane Database of Systematic Reviews<br/>                     ACP Journal Club<br/>                     Database of Abstracts of Reviews of Effects<br/>                     Cochrane Central Register of Controlled Trials<br/>                     Cochrane Methodology Register<br/>                     Health Technology Assessment<br/>                     NHS Economic Evaluation Database</li> <li>• <b>ProQuest Databases:</b><br/>                     Applied Social Sciences Index and Abstracts (ASSIA)<br/>                     International Bibliography of the Social Sciences (IBSS)<br/>                     PILOTS: Published International Literature On Traumatic Stress<br/>                     PsycARTICLES,<br/>                     Social Services Abstracts,<br/>                     Sociological Abstracts</li> </ul> |
| <b>b. Search Terms used in Key Words</b>                                                                                                                                                                                                                                                                                                                                                                                                                                                                                                                                                                                                            |                                                                                                                                                                                                                                                                                                                                                                                                                                                                                                                                                                                                                                                                                                                                                                                                                                                                                                                                                |
| <ul style="list-style-type: none"> <li>• "Assisted Outpatient Treatment" OR</li> <li>• "Community Treatment Order" OR</li> <li>• "Involuntary Outpatient Treatment" OR</li> <li>• "Involuntary Outpatient Commit*" OR</li> <li>• "Outpatient Commit*" OR</li> <li>• "Compulsory Community Treatment" OR</li> <li>• "Compulsory Outpatient Treatment" OR</li> <li>• "Mandat* Community Treatment" OR</li> <li>• "Mandat* Outpatient Treatment" OR</li> <li>• "Supervised Community Treatment" OR</li> <li>• "Extended Leave" OR</li> <li>• "Conditional Leave" OR</li> <li>• "Conditional Discharge" OR</li> <li>• "Supervised Discharge"</li> </ul> | <p style="text-align: center;"><b>AND</b></p> <ul style="list-style-type: none"> <li>• Coerc* OR</li> <li>• Attitude* OR</li> <li>• Experience* OR</li> <li>• Perceive* OR Perception</li> </ul>                                                                                                                                                                                                                                                                                                                                                                                                                                                                                                                                                                                                                                                                                                                                               |
